# Supplementary material for: Improving Nursing Home Care through Feedback On PerfoRMance Data (INFORM): Protocol for a cluster-randomized trial
Source: Springer Nature journal article supplement (doi:10.1186/s13063-016-1748-8), 2017-01-10
Supplement: MOESM2 [file 11989542]

**Additional file 2: Terms of reference INFORM committee and working group structure**

| <b>Committee</b>           | <b>Role</b>                                                                                                                                               | <b>Responsibilities</b>                                                                                                                                                                                                                                                                                                                                              | <b>Accountable to</b>                                 | <b>Team members</b>                                                                                                                                                                                                                 | <b>Meeting Details</b>                                            |
|----------------------------|-----------------------------------------------------------------------------------------------------------------------------------------------------------|----------------------------------------------------------------------------------------------------------------------------------------------------------------------------------------------------------------------------------------------------------------------------------------------------------------------------------------------------------------------|-------------------------------------------------------|-------------------------------------------------------------------------------------------------------------------------------------------------------------------------------------------------------------------------------------|-------------------------------------------------------------------|
| INFORM Oversight Committee | <p>Acts as final decision-making body for INFORM and provides overall direction to the project.</p> <p>Resolves issues that arise from working groups</p> | <ol style="list-style-type: none"> <li>1. Oversees the overall implementation of the INFORM project</li> <li>2. Reviews and approves protocols and policies</li> <li>3. Addresses deviations from or modifications to trial and intervention protocols or their sub-protocols</li> <li>4. Budget oversight</li> <li>5. Monitors INFORM study deliverables</li> </ol> | PI (Estabrooks)<br>TREC Research Management Committee | <p>Carole Estabrooks<br/>Liane Ginsburg<br/>Matthias Hoben<br/>Ruth Anderson<br/>Liane Ginsburg<br/>Jayna Holroyd-Leduc<br/>Janet Squires</p> <p>Staff<br/>Fiona Mackenzie<br/>Daley Laing</p> <p>Ex-officio<br/>Cecilia Bukutu</p> | <p>Meets Monthly</p> <p>teleconference</p> <p>1 hour meetings</p> |

| <b>Committee</b>    | <b>Role</b>                                                                                                                                                | <b>Responsibilities</b>                                                                                                                                                                                                                                                                                                                                                                                                     | <b>Accountable to</b>      | <b>Team members</b>                                                                                                                                                   | <b>Meeting Details</b>                                     |
|---------------------|------------------------------------------------------------------------------------------------------------------------------------------------------------|-----------------------------------------------------------------------------------------------------------------------------------------------------------------------------------------------------------------------------------------------------------------------------------------------------------------------------------------------------------------------------------------------------------------------------|----------------------------|-----------------------------------------------------------------------------------------------------------------------------------------------------------------------|------------------------------------------------------------|
| Trial Working Group | <p>Ensures research protocols are in place</p> <p>Monitors the implementation of the research and intervention protocols assuring quality and fidelity</p> | <ol style="list-style-type: none"> <li>1. Develops the trial protocol and policies</li> <li>2. Responsible for the Trial registration</li> <li>3. Responsible for developing data collection and process measure tools</li> <li>4. Works closely with the data unit to develop any feedback materials</li> <li>5. Develops fidelity measures</li> <li>6. Proposes publication and other dissemination activities</li> </ol> | INFORM Oversight Committee | <p>Carole Estabrooks<br/>Peter Norton<br/>Matthias Hoben<br/>Liane Ginsburg</p> <p>Staff<br/>Fiona Mackenzie<br/>Daley Laing</p> <p>Ex-officio<br/>Cecilia Bukutu</p> | <p>Weekly</p> <p>teleconference</p> <p>1 hour meetings</p> |

| Committee                  | Role                                                     | 7. Responsibilities                                                                                                                                                                                                                                                                                                                                                                                                                                                                                      | Accountable to             | Team members                                                                                                                                                                  | Meeting Details                                                            |
|----------------------------|----------------------------------------------------------|----------------------------------------------------------------------------------------------------------------------------------------------------------------------------------------------------------------------------------------------------------------------------------------------------------------------------------------------------------------------------------------------------------------------------------------------------------------------------------------------------------|----------------------------|-------------------------------------------------------------------------------------------------------------------------------------------------------------------------------|----------------------------------------------------------------------------|
| Intervention Working Group | Develops and ensures delivery of the INFORM intervention | <ol style="list-style-type: none"> <li>1. Operationalizes the project intervention plan and develops the intervention protocol</li> <li>2. Develops the implementation strategy of the Goal Setting and the support workshops</li> <li>3. Oversees (and develops) the development of intervention materials (workshop presentations, goal setting workbook)</li> <li>8. Advises and makes recommendations to the Trail working group on any changes/deviations from the intervention protocol</li> </ol> | INFORM Oversight Committee | Liane Ginsburg<br>Matthias Hoben<br>Don McLeod<br>Ruth Anderson<br>Dee Taylor<br><br>Staff<br>Fiona Mackenzie<br>Daley Laing<br>Alvina Ng<br><br>Ex-officio<br>Cecilia Bukutu | Weekly to bi-weekly as needed<br><br>teleconference<br><br>1 hour meetings |
